# Supplementary figures and images for: Consumer Perceptions of Precision Livestock Farming—A Qualitative Study in Three European Countries
Source: MDPI journal article supplement (doi:10.3390/ani11051221), 2021-04-23

# Lifetime cycle of a pig

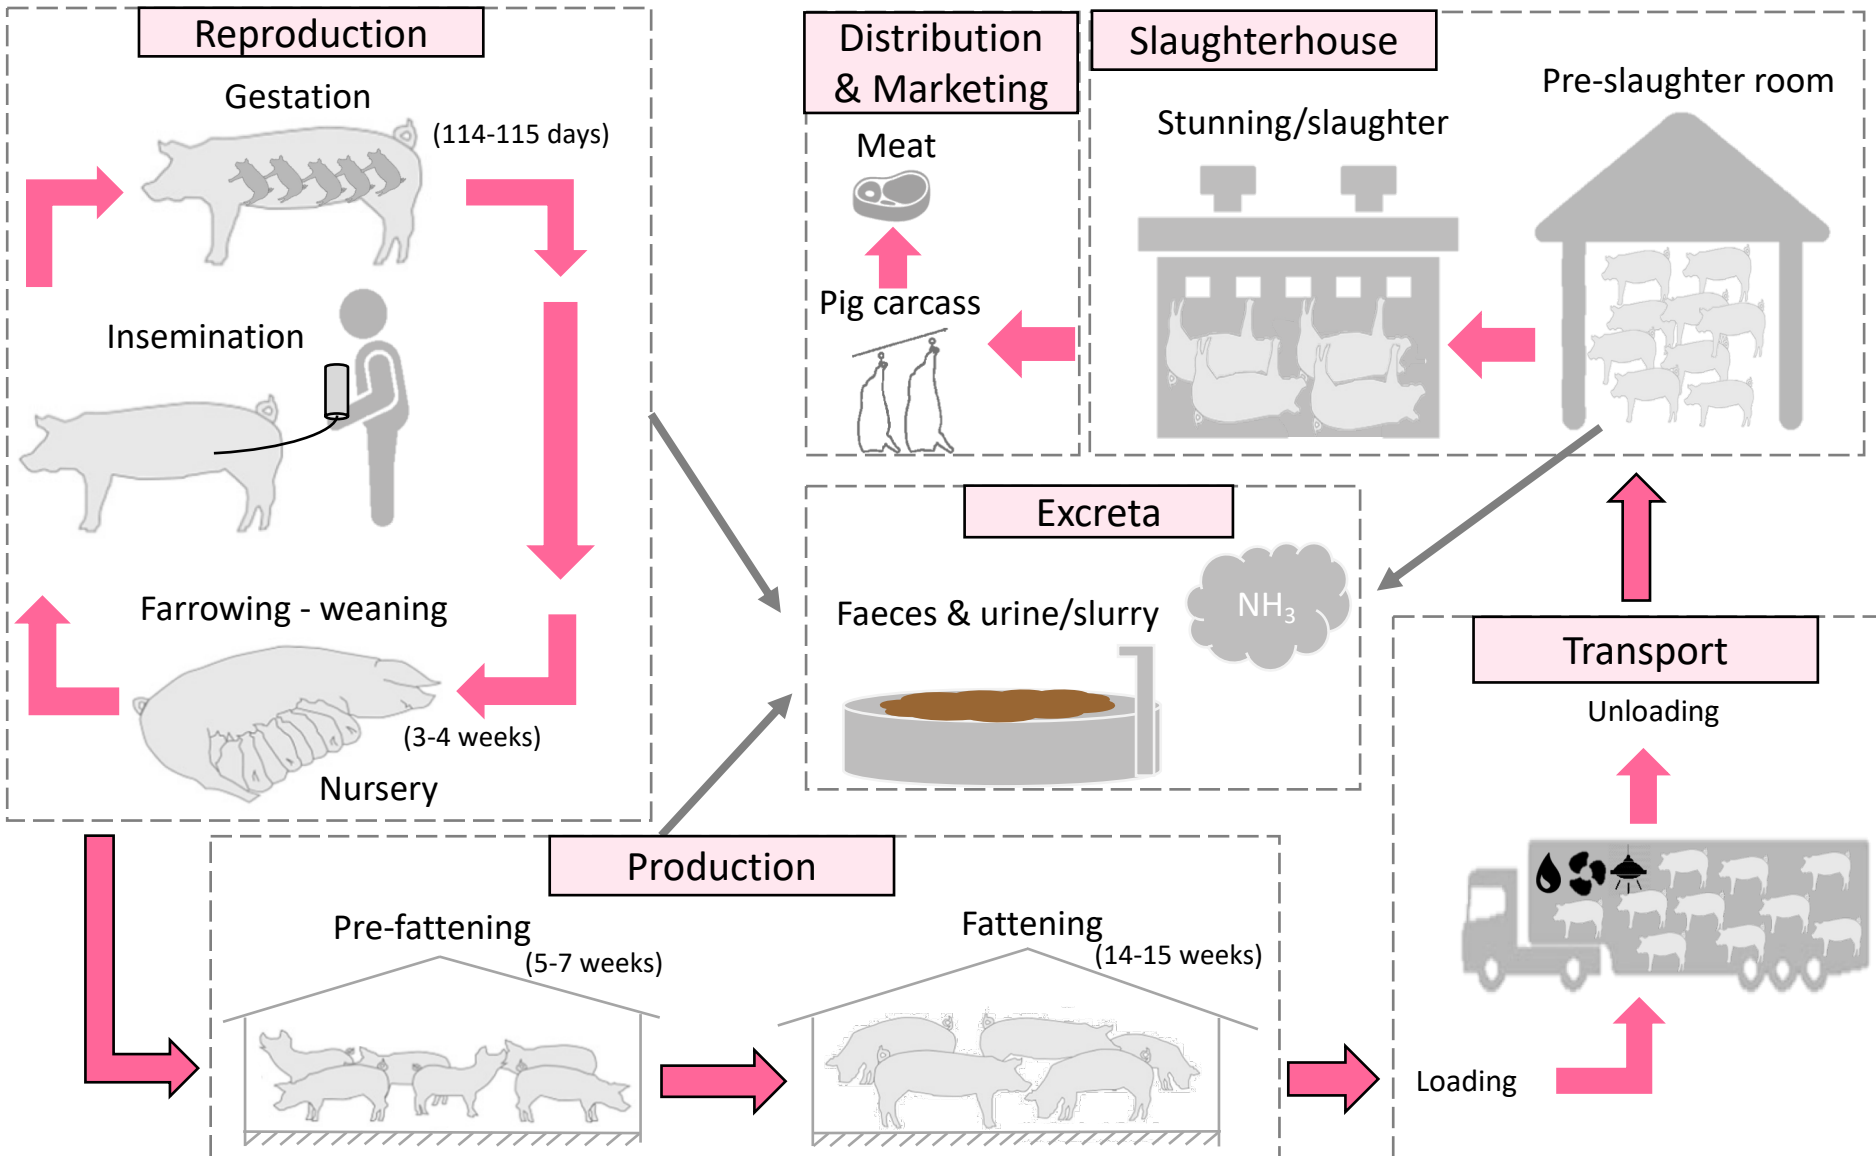

Supplement: s1 [file s1]

# Lifetime cycle of dairy cow

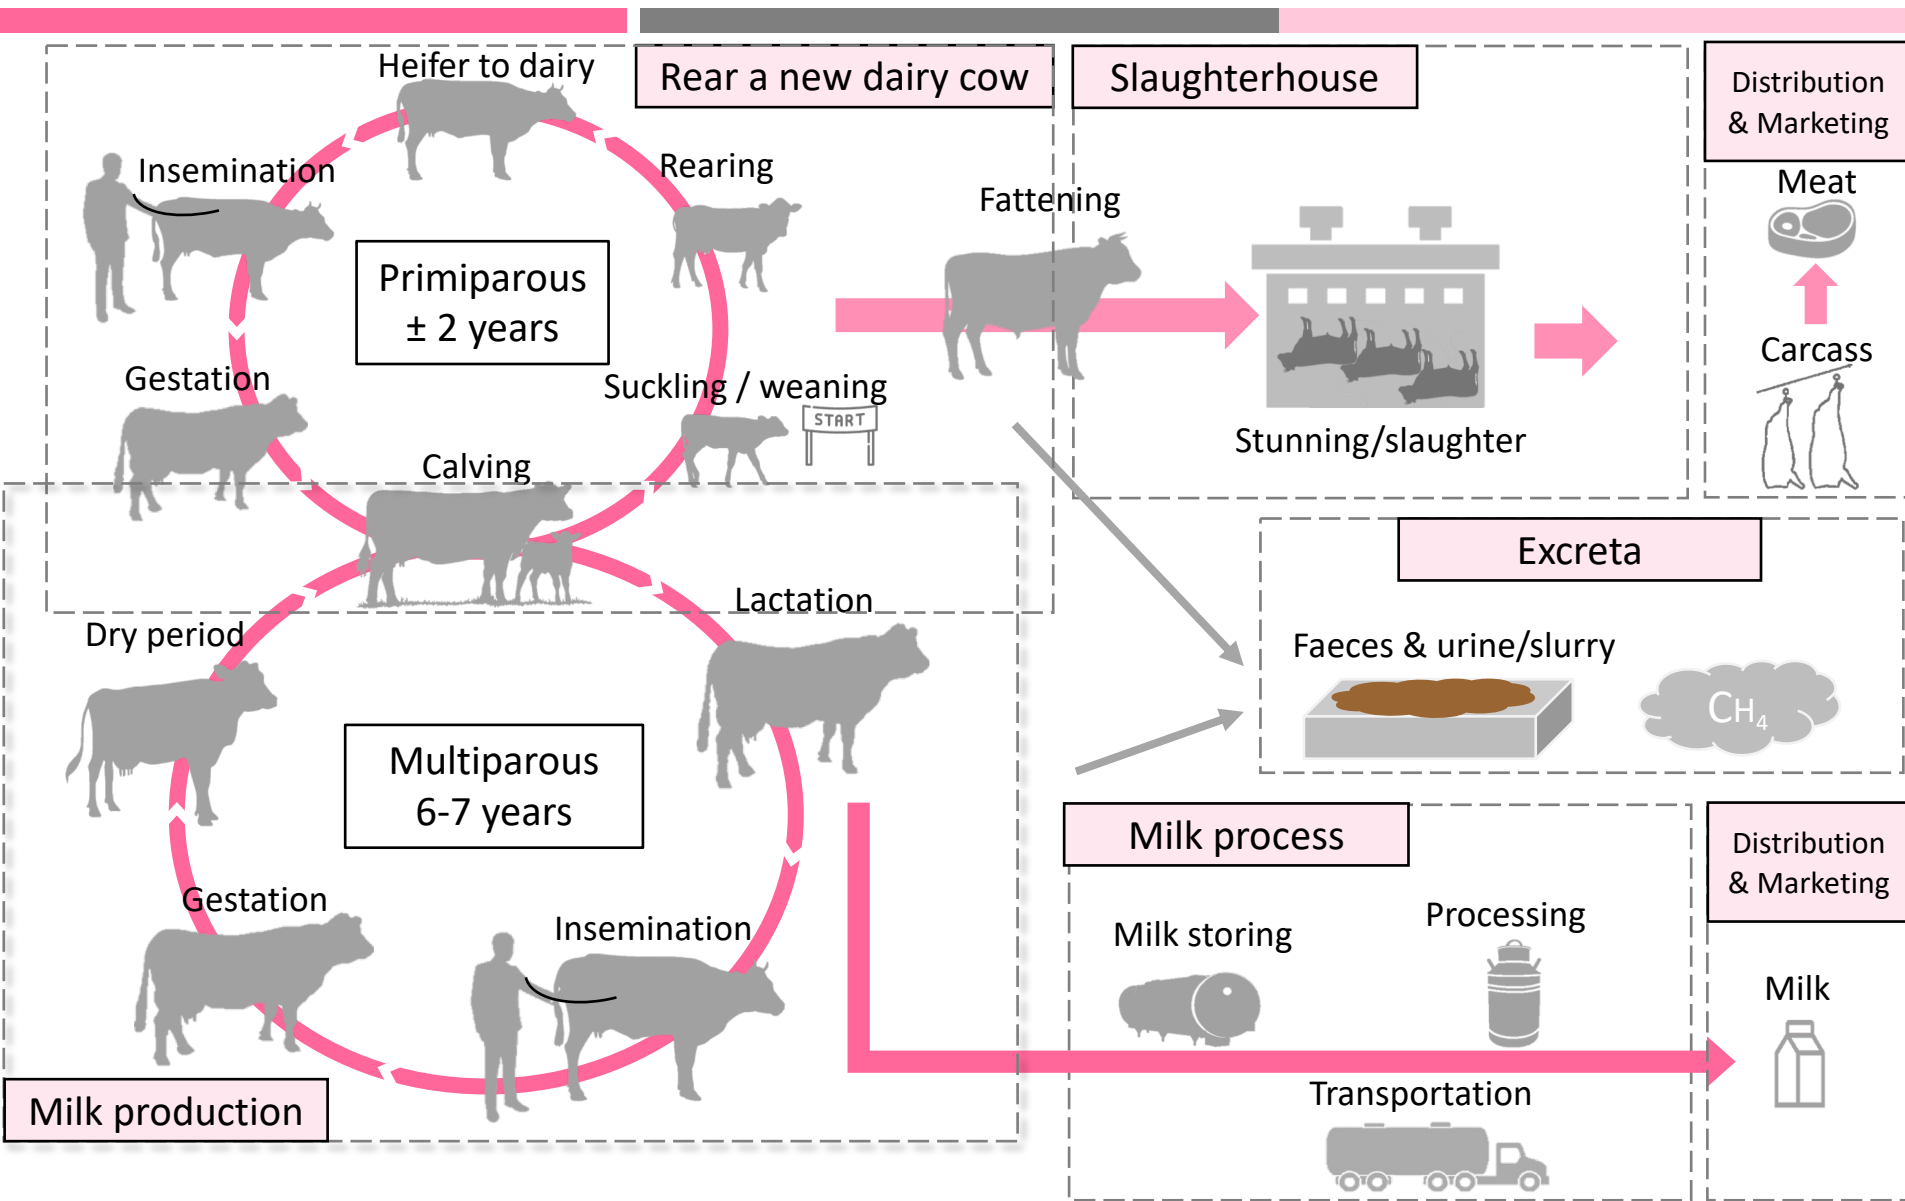

Supplement: s1 [file s1]
